# Supplementary material for: Electrogenerated chemiluminescence resonance energy transfer between luminol and MnO2 nanosheets decorated with Cu2O nanoparticles for sensitive detection of RNase H
Source: Royal Society of Chemistry journal article supplement (doi:10.1039/d3an00002h), 2023-01-01
Supplement: d3an00002h1.pdf [file d3an00002h1.pdf]

## Supporting Material

Electrogenerated chemiluminescent resonance energy transfer  
between luminol and MnO<sub>2</sub> nanosheets decorated with Cu<sub>2</sub>O  
nanoparticles for sensitive detection of RNase H

Yahao Shi, Chunting Chen, Yahui Zhang, Yongping Dong\*, Shangbing Wang\*

*School of Chemistry and Chemical Engineering, Institute of Engineering, Anhui*

*University of Technology, Maanshan, Anhui 243002, China*

---

\*Corresponding author. Tel: +86-555-2311807, Email

address: [dongyp524@163.com](mailto:dongyp524@163.com), [sbwang@ahut.edu.cn](mailto:sbwang@ahut.edu.cn)

## **1. Pretreatment of glassy carbon electrode**

Prior to modification, a glassy carbon electrode (GCE, 3 mm in diameter) was polished with 0.05  $\mu\text{m}$   $\text{Al}_2\text{O}_3$  suspension to a mirror, and cleaned thoroughly in an ultrasonic cleaner with alcohol and water for 30 s, respectively. The polished GCE was further cleaned in 1 mM  $\text{K}_3\text{Fe}(\text{CN})_6$  solution between -0.20 and 0.60 V (vs SCE) at a potential scan rate of 100  $\text{mV s}^{-1}$  until a pair of reversible peaks was obtained, indicating that the electrode surface was cleaned.

## **2. ECL and electrochemical measurement**

ECL measurements were performed with a model MPI-M electrochemiluminescence analyzer (Xi'An Remax Electronic Science & Technology Co. Ltd., China) at room temperature, applying the potential from 0 V to 1.5 V with the scanning rate of 100  $\text{mV s}^{-1}$ , and the photomultiplier high voltage was set at 800 V during the detection. Electrochemical experiments were carried out on a CHI 760D electrochemical workstation (CH Instruments Co., China). In this work, there was a conventional three-electrode system, in which a modified GCE was used as the working electrode, a platinum wire was applied as the counter electrode and an SCE was utilized as the reference electrode, respectively.

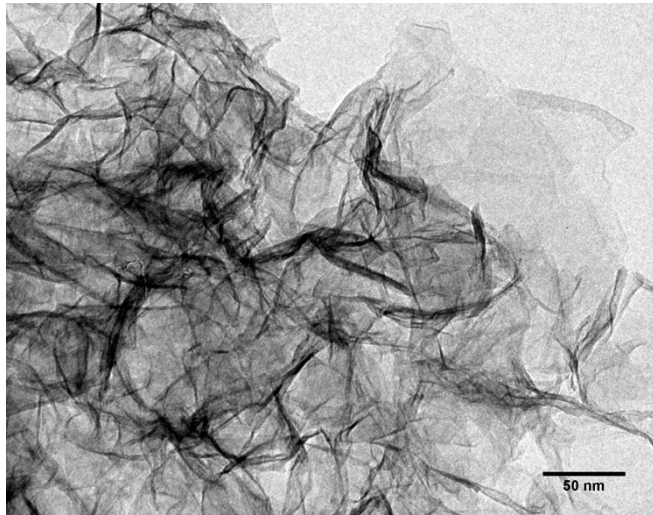

Fig.S1 TEM image of MnO<sub>2</sub> nanosheets

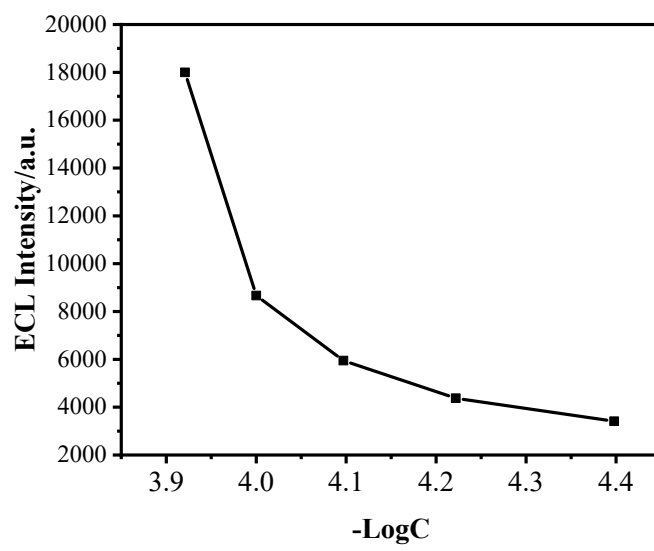

Fig.S2 Effect of luminol concentration on ECL intensity

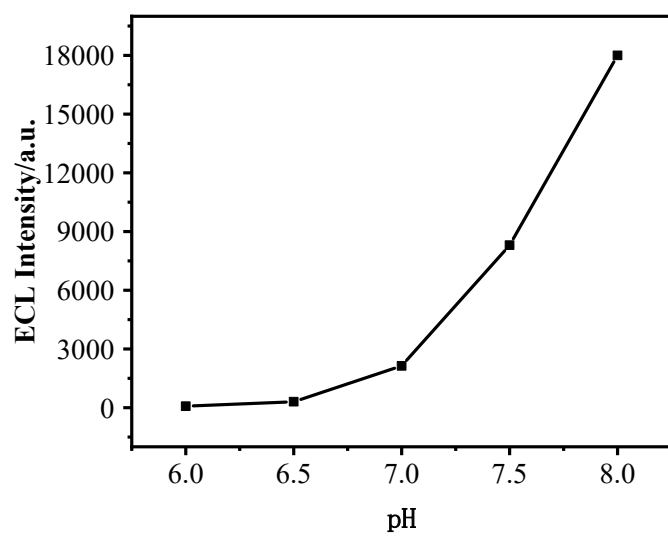

Fig.S3 Effect pH values on luminol ECL

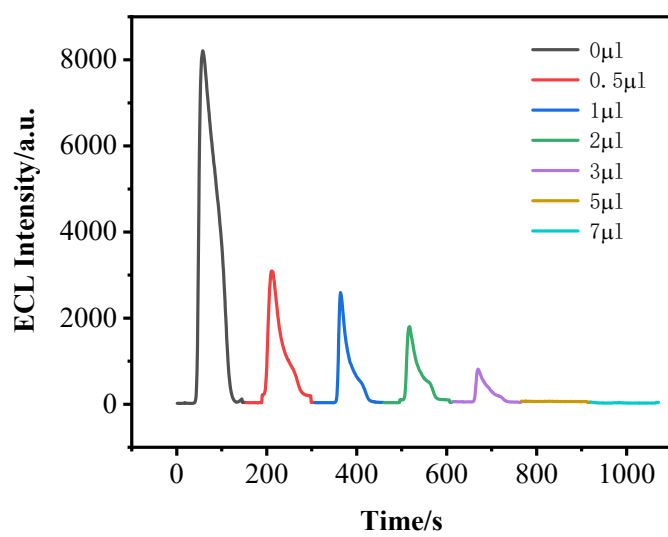

Fig.S4 Effect of modified amount of  $\text{Cu}_2\text{O}@\text{MnO}_2$  suspension on luminol ECL
